# Supplementary material for: Humanized Dsp ACM Mouse Model Displays Stress-Induced Cardiac Electrical and Structural Phenotypes
Source: MDPI journal article supplement (doi:10.3390/cells11193049), 2022-09-29
Supplement: s1 [file s1]

## Supplementary Material

### Supplementary Tables

**Table S1:** Primers: All primers utilized throughout the manuscript are provided below.

| Primer Name                   | Primer Sequence 5'-3'    | Use              |
|-------------------------------|--------------------------|------------------|
| <i>Dsp</i> R451G Genotyping F | 5'-GCACTCGTGTTAAAGGCAGAC | Mouse Genotyping |
| <i>Dsp</i> R451G Genotyping R | 5'-CCTGGTCTTGTTTGTAGTCGC | Mouse Genotyping |
| <i>Dsp</i> qPCR F             | 5'-CACTCTTCAGACGCAGGTGGA | qPCR             |
| <i>Dsp</i> qPCR R             | 5'-GCCCTTCAGGTAGGCTTCAG  | qPCR             |
| <i>Hprt</i> qPCR F            | 5'-TGCTGACCTGCTGGATTACA  | qPCR             |
| <i>Hprt</i> qPCR R            | 5'-TTATGTCCCCCGTTGACTGA  | qPCR             |

**Table S2:** Antibodies: Primary and secondary antibodies utilized throughout the manuscript are provided below.

| Antibody Target                         | Manufacturer            | Reference   | Host       | Class      | Application | Concentration |
|-----------------------------------------|-------------------------|-------------|------------|------------|-------------|---------------|
| <b>Desmoplakin</b>                      | Abcam                   | ab16434     | Mouse      | Monoclonal | IB/IF       | 1:500/1:100   |
| <b>Desmoplakin</b>                      | Abcam                   | ab71690     | Rabbit     | Polyclonal | IF          | 1:100         |
| <b>Plakoglobin</b>                      | Abcam                   | ab15153     | Rabbit     | Polyclonal | IB/IF       | 1:2500/1:100  |
| <b>Plakophilin-2</b>                    | Fitzgerald              | 10R-P130B   | Mouse      | Monoclonal | IB/IF       | 1:1000/1:100  |
| <b>N-Cadherin</b>                       | Invitrogen              | 33-3900     | Mouse      | Monoclonal | IB/IF       | 1:1000/1:200  |
| <b>N-Cadherin</b>                       | Invitrogen              | PA5-19486   | Rabbit     | Polyclonal | IF          | 1:200         |
| <b>GAPDH</b>                            | Fitzgerald              | 10R-G109A   | Mouse      | Monoclonal | IB          | 1:10000       |
| <b>Connexin-43</b>                      | Abcam                   | ab11370     | Rabbit     | Polyclonal | IB/IF       | 1:2000/1:200  |
| <b>pConnexin-43 (Ser 368)</b>           | Sigma-Aldrich           | AB3841      | Rabbit     | Polyclonal | IB          | 1:1000        |
| <b>Integrin <math>\beta</math>1D</b>    | Abcam                   | ab8991      | Mouse      | Monoclonal | IB          | 1:1000        |
| <b><math>\beta</math>-Catenin</b>       | Invitrogen              | MA1-300     | Mouse      | Monoclonal | IB          | 1:1000        |
| <b>Donkey Anti-mouse HRP (2°)</b>       | Jackson Immunology      | 715-035-150 | Donkey     | Polyclonal | IB          | 1:5000        |
| <b>Donkey Anti-Rabbit HRP (2°)</b>      | Jackson Immunology      | 711-035-152 | Donkey     | Polyclonal | IB          | 1:10000       |
| <b>Donkey Anti-Mouse IgG Fluro 488</b>  | ThermoFisher Scientific | A21202      | Donkey IgG | Polyclonal | IF          | 1:400         |
| <b>Donkey Anti-Mouse IgG Fluro 568</b>  | ThermoFisher Scientific | A10037      | Donkey IgG | Polyclonal | IF          | 1:400         |
| <b>Donkey Anti-Rabbit IgG Fluro 488</b> | ThermoFisher Scientific | A21206      | Donkey IgG | Polyclonal | IF          | 1:400         |
| <b>Donkey Anti-Rabbit IgG Fluro 568</b> | ThermoFisher Scientific | A10042      | Donkey IgG | Polyclonal | IF          | 1:400         |

**Table S3:** Full list of echocardiographic findings from *Dsp*<sup>R451G/+</sup> mice and control littermates.

| Sex    | Genotype   | IVSd (cm)        | LVIDd (cm)      | EDV (mL)        | LVPWd (cm)       | IVSs (cm)        | LVIDs (cm)      | ESV (mL)         | EF%          | FS%           | LVPWs (cm)       |
|--------|------------|------------------|-----------------|-----------------|------------------|------------------|-----------------|------------------|--------------|---------------|------------------|
| Male   | Control    | 0.04             | 0.41            | 0.17            | 0.05             | 0.05             | 0.3             | 0.07             | 56.75        | 25.31         | 0.07             |
| Male   | Control    | 0.05             | 0.39            | 0.15            | 0.04             | 0.07             | 0.28            | 0.06             | 60.69        | 27.71         | 0.07             |
| Male   | Control    | 0.05             | 0.35            | 0.11            | 0.06             | 0.06             | 0.23            | 0.03             | 70.75        | 34.62         | 0.07             |
| Male   | Control    | 0.04             | 0.39            | 0.15            | 0.06             | 0.05             | 0.29            | 0.06             | 58.10        | 26.09         | 0.06             |
| Male   | Control    | 0.05             | 0.37            | 0.13            | 0.06             | 0.06             | 0.28            | 0.06             | 57.47        | 25.68         | 0.07             |
| Male   | Control    | 0.04             | 0.42            | 0.18            | 0.05             | 0.05             | 0.29            | 0.06             | 65.82        | 31.17         | 0.07             |
| Male   | Control    | 0.04             | 0.42            | 0.19            | 0.05             | 0.06             | 0.31            | 0.08             | 57.84        | 26.00         | 0.06             |
| Female | Control    | 0.04             | 0.34            | 0.1             | 0.06             | 0.05             | 0.26            | 0.05             | 53.89        | 23.50         | 0.09             |
| Female | Control    | 0.03             | 0.34            | 0.1             | 0.05             | 0.05             | 0.25            | 0.04             | 59.76        | 27.00         | 0.06             |
| Female | Control    | 0.04             | 0.36            | 0.12            | 0.05             | 0.05             | 0.25            | 0.04             | 67.01        | 31.87         | 0.06             |
| Female | Control    | 0.04             | 0.35            | 0.11            | 0.05             | 0.06             | 0.23            | 0.03             | 70.53        | 34.45         | 0.07             |
| Female | Control    | 0.05             | 0.35            | 0.11            | 0.06             | 0.06             | 0.27            | 0.05             | 53.51        | 23.30         | 0.07             |
| Female | Control    | 0.04             | 0.36            | 0.12            | 0.05             | 0.05             | 0.27            | 0.05             | 57.56        | 25.70         | 0.06             |
| Female | Control    | 0.05             | 0.38            | 0.14            | 0.06             | 0.08             | 0.25            | 0.04             | 68.56        | 33.04         | 0.09             |
|        | Mean ± SEM | 0.0429 ± 0.00163 | 0.374 ± 0.00760 | 0.134 ± 0.00796 | 0.0536 ± 0.00169 | 0.0571 ± 0.00244 | 0.269 ± 0.00662 | 0.0514 ± 0.00390 | 61.30 ± 1.61 | 28.25 ± 1.06  | 0.0693 ± 0.00267 |
|        |            |                  |                 |                 |                  |                  |                 |                  |              |               |                  |
| Male   | R451G+     | 0.05             | 0.42            | 0.19            | 0.06             | 0.07             | 0.3             | 0.07             | 63.49        | 29.60         | 0.07             |
| Male   | R451G+     | 0.04             | 0.39            | 0.15            | 0.05             | 0.06             | 0.25            | 0.04             | 72.31        | 35.93         | 0.07             |
| Male   | R451G+     | 0.05             | 0.42            | 0.18            | 0.06             | 0.06             | 0.33            | 0.09             | 50.53        | 21.77         | 0.09             |
| Male   | R451G+     | 0.04             | 0.39            | 0.15            | 0.06             | 0.05             | 0.3             | 0.07             | 53.49        | 23.38         | 0.07             |
| Male   | R451G+     | 0.04             | 0.35            | 0.11            | 0.06             | 0.05             | 0.25            | 0.04             | 63.04        | 29.13         | 0.09             |
| Male   | R451G+     | 0.05             | 0.36            | 0.12            | 0.05             | 0.06             | 0.25            | 0.04             | 63.89        | 29.72         | 0.08             |
| Male   | R451G+     | 0.04             | 0.35            | 0.11            | 0.06             | 0.06             | 0.25            | 0.04             | 61.33        | 28.02         | 0.07             |
| Male   | R451G+     | 0.04             | 0.39            | 0.15            | 0.06             | 0.05             | 0.28            | 0.06             | 60.98        | 27.90         | 0.08             |
| Male   | R451G+     | 0.03             | 0.37            | 0.13            | 0.06             | 0.06             | 0.28            | 0.06             | 57.11        | 25.45         | 0.08             |
| Male   | R451G+     | 0.04             | 0.4             | 0.16            | 0.06             | 0.05             | 0.29            | 0.06             | 59.05        | 26.69         | 0.08             |
| Female | R451G+     | 0.03             | 0.37            | 0.13            | 0.07             | 0.06             | 0.28            | 0.06             | 55.78        | 24.66         | 0.08             |
| Female | R451G+     | 0.04             | 0.39            | 0.14            | 0.05             | 0.05             | 0.3             | 0.07             | 53.28        | 23.25         | 0.05             |
| Female | R451G+     | 0.03             | 0.37            | 0.13            | 0.04             | 0.05             | 0.26            | 0.04             | 66.04        | 31.22         | 0.06             |
| Female | R451G+     | 0.04             | 0.37            | 0.13            | 0.06             | 0.05             | 0.26            | 0.04             | 65.80        | 31.05         | 0.08             |
| Female | R451G+     | 0.04             | 0.38            | 0.13            | 0.05             | 0.05             | 0.29            | 0.06             | 54.22        | 23.77         | 0.06             |
| Female | R451G+     | 0.04             | 0.36            | 0.12            | 0.05             | 0.05             | 0.27            | 0.05             | 57.56        | 25.70         | 0.06             |
| Female | R451G+     | 0.03             | 0.39            | 0.15            | 0.05             | 0.07             | 0.27            | 0.05             | 65.70        | 31.03         | 0.07             |
|        | Mean ± SEM | 0.0394 ± 0.00160 | 0.381 ± 0.00511 | 0.140 ± 0.00542 | 0.0559 ± 0.00173 | 0.0559 ± 0.00173 | 0.277 ± 0.00554 | 0.0553 ± 0.00355 | 60.21 ± 1.40 | 27.55 ± 0.900 | 0.0729 ± 0.00268 |
|        |            |                  |                 |                 |                  |                  |                 |                  |              |               |                  |
|        | p-value    | 0.145            | 0.437           | 0.547           | 0.353            | 0.669            | 0.330           | 0.470            | 0.612        | 0.616         | 0.346            |

IVSd/s: Interventricular septum at diastole/systole. LVIDd/s: Left ventricular internal diameter at diastole/systole. EDV/ESV: End diastolic volume/ End systolic volume. LVPWd/s: Left ventricular posterior wall at diastole/systole. EF: Ejection Fraction. FS: Fractional shortening.

**Table S4:** ECG findings from conscious mice without anesthetic or catecholaminergic stimulation.

| Sex    | Genotype       | RR Interval (s)      | Heart Rate (BPM) | PR Interval (s)       | P Duration (s)         | QRS Interval (s)      | QT Interval (s)       | QTc (s)               | Tpeak Tend Interval (s) |
|--------|----------------|----------------------|------------------|-----------------------|------------------------|-----------------------|-----------------------|-----------------------|-------------------------|
| Male   | Control        | 0.0841               | 715.1            | 0.0311                | 0.00830                | 0.00996               | 0.0197                | 0.0215                | 0.00790                 |
| Male   | Control        | 0.105                | 573.4            | 0.0316                | 0.0103                 | 0.0117                | 0.0202                | 0.0197                | 0.00595                 |
| Male   | Control        | 0.101                | 601.8            | 0.0320                | 0.00953                | 0.0108                | 0.0210                | 0.0209                | 0.00815                 |
| Male   | Control        | 0.0871               | 691.7            | 0.0315                | 0.00940                | 0.0110                | 0.0220                | 0.0236                | 0.00990                 |
| Female | Control        | 0.0871               | 690.0            | 0.0320                | 0.00843                | 0.0112                | 0.0213                | 0.0229                | 0.00675                 |
| Female | Control        | 0.0881               | 683.8            | 0.0340                | 0.00880                | 0.00987               | 0.0195                | 0.0208                | 0.00664                 |
| Female | Control        | 0.0834               | 720.5            | 0.0336                | 0.00940                | 0.00942               | 0.0194                | 0.0213                | 0.00872                 |
| Female | Control        | 0.0813               | 738.3            | 0.0329                | 0.00940                | 0.00998               | 0.0208                | 0.0231                | 0.00682                 |
|        | Mean $\pm$ SEM | 0.0896 $\pm$ 0.00305 | 676.8 $\pm$ 20.7 | 0.0323 $\pm$ 0.000376 | 0.00919 $\pm$ 0.000229 | 0.0105 $\pm$ 0.000285 | 0.0205 $\pm$ 0.000334 | 0.0217 $\pm$ 0.000473 | 0.00760 $\pm$ 0.000461  |
|        |                |                      |                  |                       |                        |                       |                       |                       |                         |
| Male   | R451G+         | 0.0852               | 705.7            | 0.0326                | 0.0103                 | 0.0101                | 0.0215                | 0.0234                | 0.00972                 |
| Male   | R451G+         | 0.0952               | 635.4            | 0.0325                | 0.00848                | 0.0117                | 0.0234                | 0.0240                | 0.0105                  |
| Male   | R451G+         | 0.103                | 587.4            | 0.0319                | 0.00825                | 0.0117                | 0.0223                | 0.0220                | 0.00834                 |
| Male   | R451G+         | 0.0923               | 655.3            | 0.0334                | 0.00868                | 0.0115                | 0.0214                | 0.0223                | 0.00819                 |
| Female | R451G+         | 0.0836               | 719.6            | 0.0327                | 0.00988                | 0.0097                | 0.0208                | 0.0228                | 0.00630                 |
| Female | R451G+         | 0.0874               | 688.5            | 0.0309                | 0.00889                | 0.0098                | 0.0235                | 0.0252                | 0.01173                 |
| Female | R451G+         | 0.0876               | 688.3            | 0.0330                | 0.00876                | 0.0089                | 0.0199                | 0.0213                | 0.00988                 |
|        | Mean $\pm$ SEM | 0.0905 $\pm$ 0.00251 | 668.6 $\pm$ 17.3 | 0.0324 $\pm$ 0.000302 | 0.00903 $\pm$ 0.000285 | 0.0105 $\pm$ 0.000428 | 0.0218 $\pm$ 0.000499 | 0.0230 $\pm$ 0.000493 | 0.00924 $\pm$ 0.000674  |
|        |                |                      |                  |                       |                        |                       |                       |                       |                         |
|        | p-value        | 0.829                | 0.769            | 0.859                 | 0.672                  | 0.947                 | *0.0429               | 0.0914                | 0.0609                  |

## Supplementary Figures

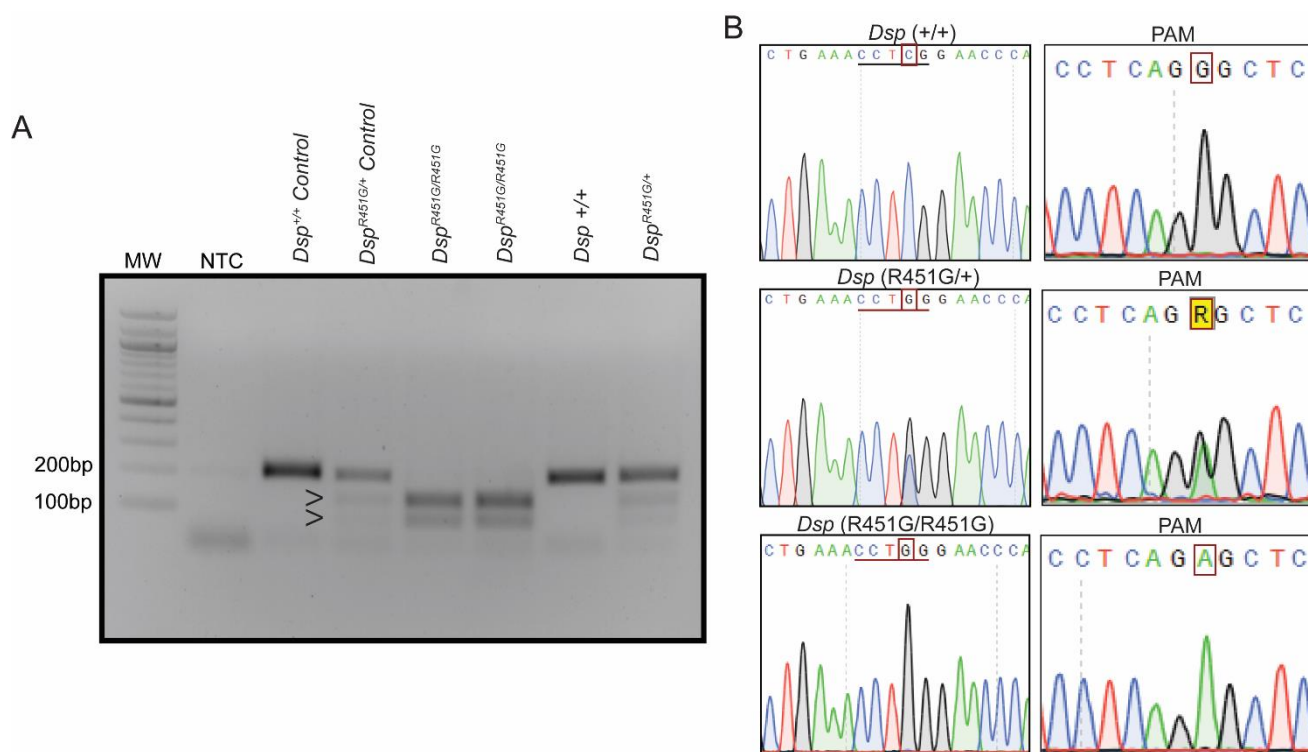

**Figure S1:** Genotyping analysis of the *Dsp*<sup>R451G/+</sup> mouse model. **(A)** Representative genotyping of the embryo isolations from *Dsp*<sup>R451G/+</sup> breeding pairs, with no template control (NTC). Control and R451G+ positive controls previously confirmed with sequencing. Restriction enzyme digest using BstNI cleaves R451G+ DNA, but not control DNA. Control allele is represented by a single band at 192bp. An R451G+ allele is two bands at 103bp and 89bp (arrowheads point to bands). **(B)** Sequencing results verified both heterozygous and homozygous R451G+ mice at the mutation site and via the PAM sequence site.

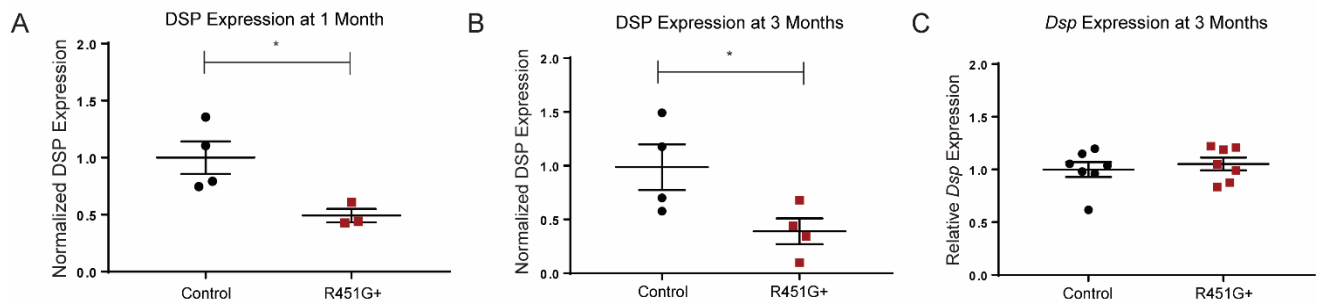

**Figure S2:** *Dsp*<sup>R451G/+</sup> mice display a reduction in DSP protein expression at different time points, with no changes in *Dsp* mRNA levels. **(A)** Immunoblot quantification of DSP from heart lysates isolated at 1 month of age (Control  $n = 4$ , *Dsp*<sup>R451G/+</sup>  $n = 3$ ), **(B)** and 3 months of age ( $n = 4$  per group). **(C)** qPCR examining *Dsp* expression from isolated cDNA from *Dsp*<sup>R451G/+</sup> and control littermates hearts at 3 months of age, normalized to *Hprt* ( $n = 7$  per group). Stats performed using Student's t-test \*  $p < 0.05$ .

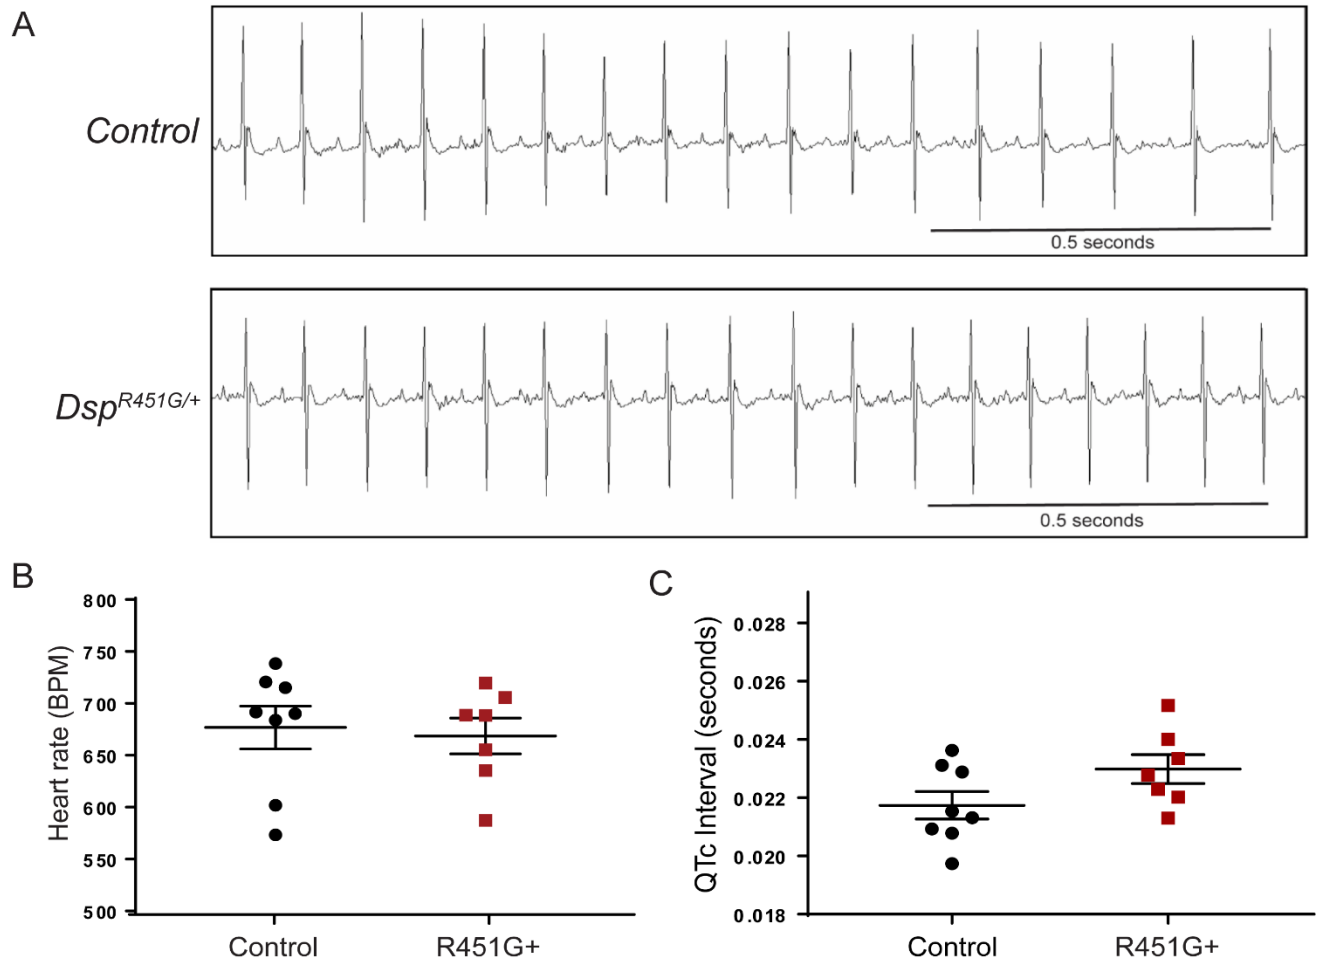

**Figure S3:** *Dsp<sup>R451G/+</sup>* display no significant electrical abnormalities baseline. **(A)** Representative ECG trace in conscious mice at ~3 months of age displayed no signs of cardiac arrhythmias or abnormal ECG morphology. Scale bars represent 500ms. **(B)** Heart rate **(C)** and QTc (Mitchell et al. normalization) intervals calculated from telemetry mice at baseline. Stats performed using Student's t-test (control  $n = 8$ , *Dsp<sup>R451G/+</sup>*  $n = 7$ ).

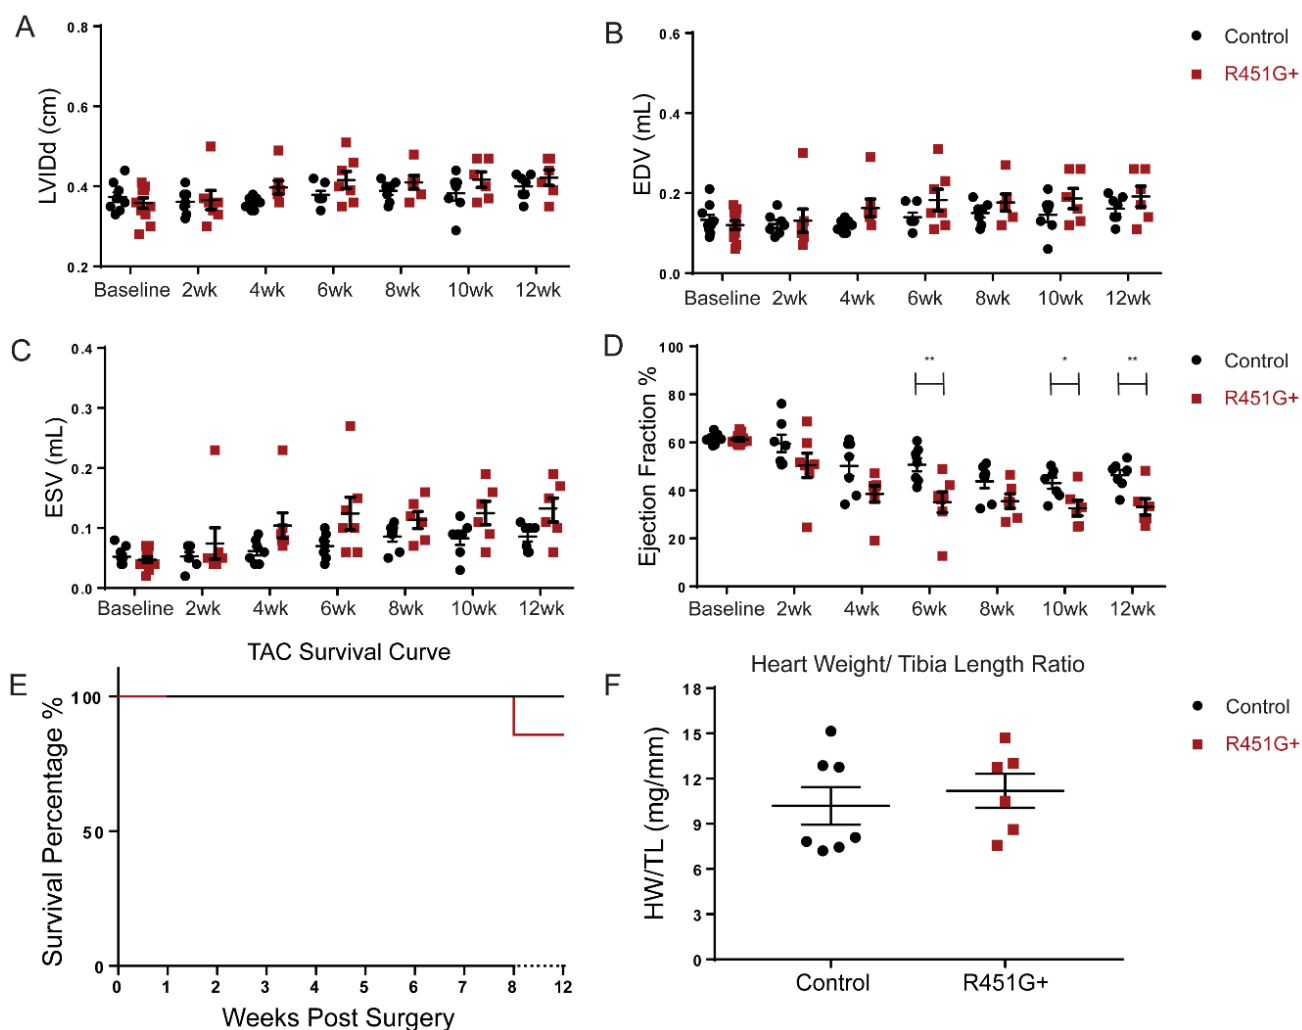

**Figure S4:** Structural changes in *Dsp*<sup>R451G/+</sup> mice post TAC surgery. Quantification of additional LV parameters from *Dsp*<sup>R451G/+</sup> and control littermates following TAC surgeries, including (A) left ventricular internal diameter at diastole, (B) end-diastolic volume, (C) end-systolic volume, (D) and ejection fraction. (E) Kaplan–Meier curve following TAC surgery. (F) Heart-weight-to-tibia length ratio at endpoint experiments/heart isolations. (control  $n = 7$ , *Dsp*<sup>R451G/+</sup>  $n = 6-7$  post-surgery). Stats performed using Student's t-test at each timepoint \*  $p < 0.05$ , \*\*  $p < 0.01$ .



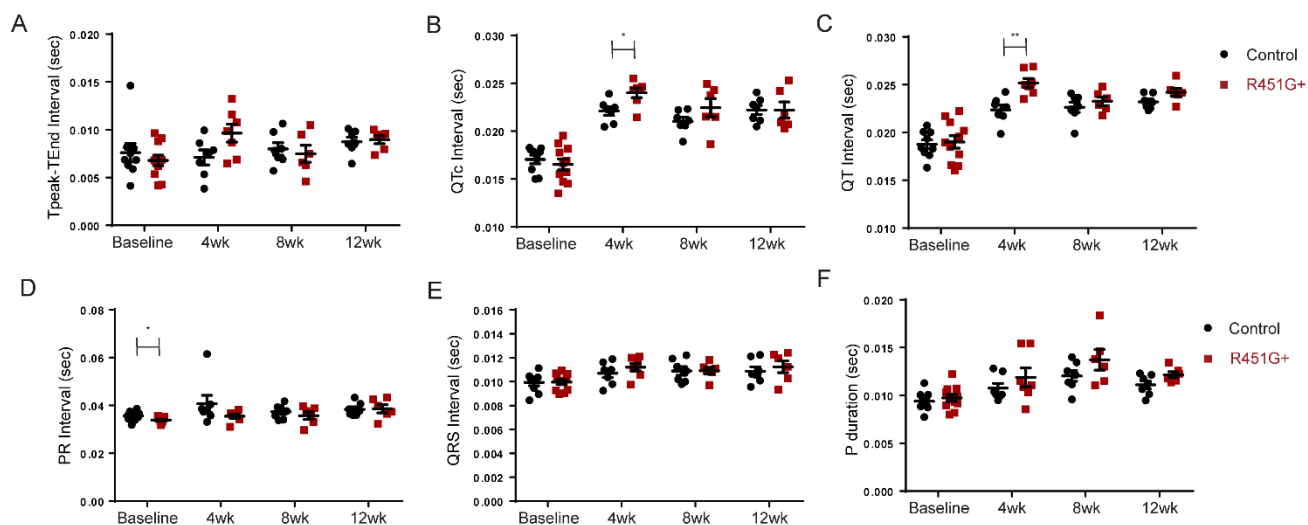

**Figure S5:** Surface ECG recordings from *Dsp<sup>R451G/+</sup>* mice and control littermates post-TAC surgery. Parameters analyzed include (A) T-peak to T-end duration, (B) QTc duration (Mitchell et al. normalization), (C) QT interval, (D) PR interval, (E) QRS interval, (F) and p duration. Stats analyzed using Student's t-test at each time point, \*  $p < 0.05$  \*\*  $p < 0.01$  (control  $n = 7$ , *Dsp<sup>R451G/+</sup>*  $n = 6-7$  post-surgery).

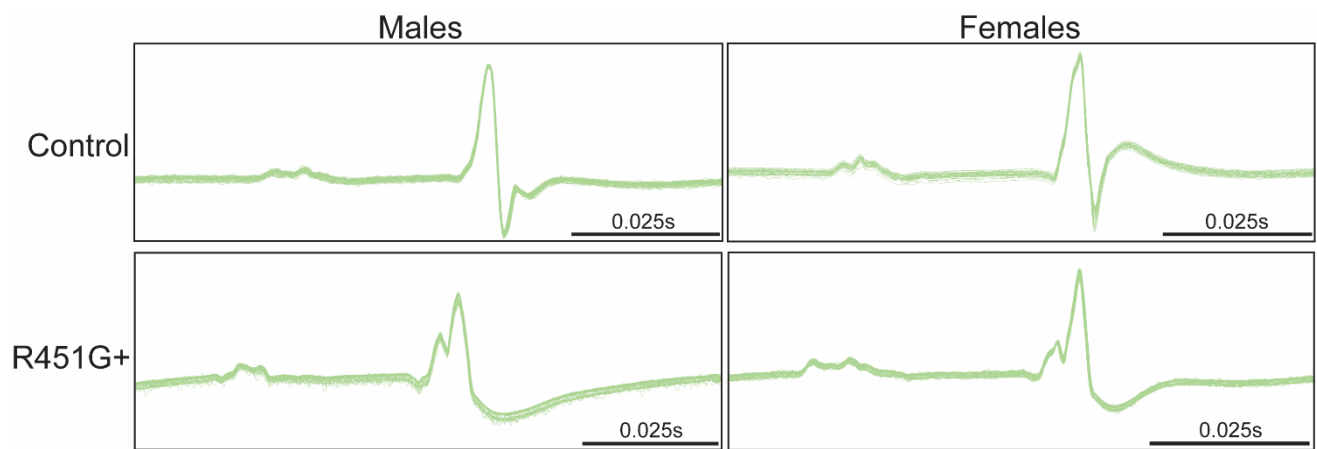

**Figure S6:** Representative ECG traces following TAC surgery. Representative traces are average ECG morphology of *Dsp*<sup>R451G/+</sup> mice and control littermates at 4 weeks post-TAC. Scale bars represent 0.025 seconds.

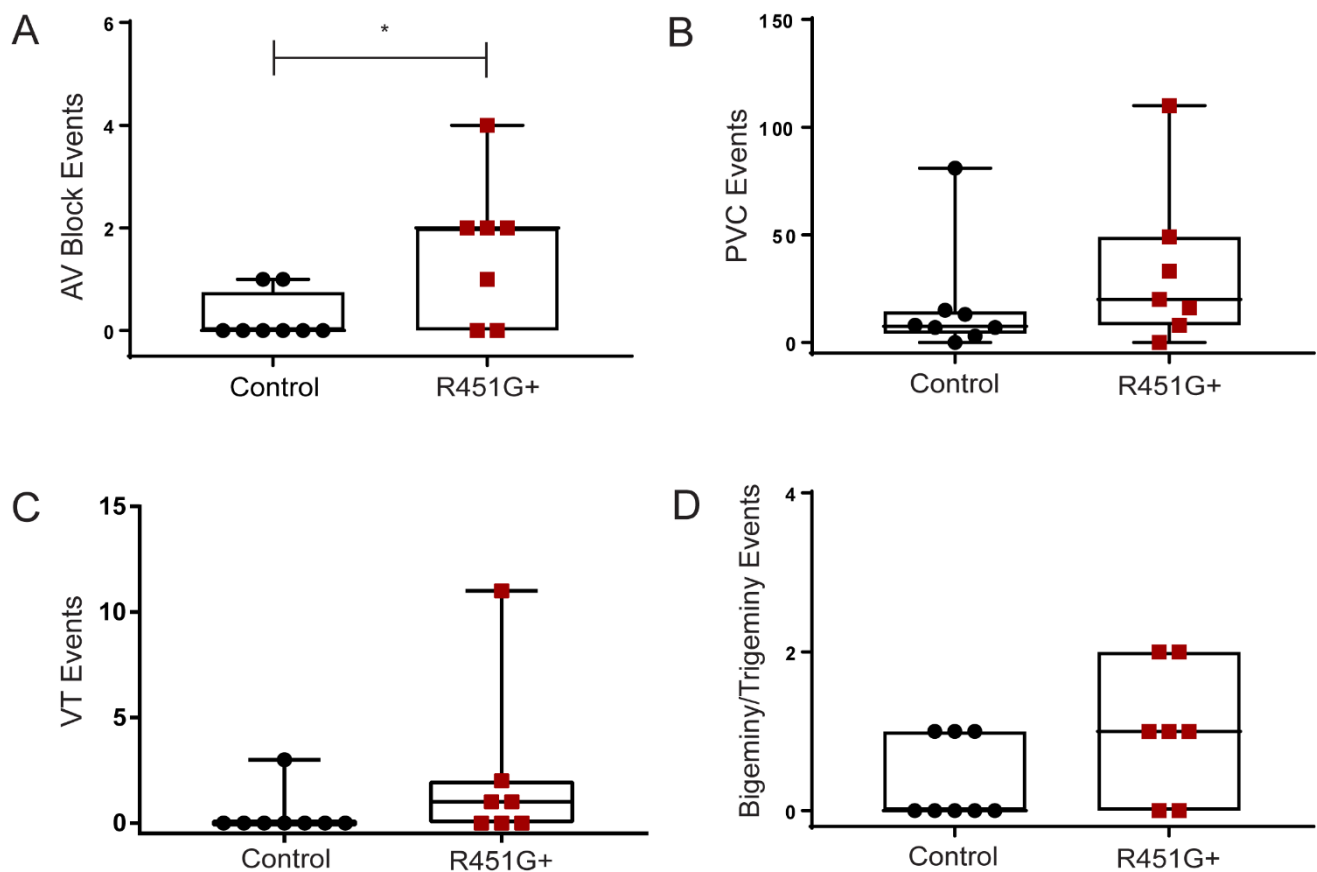

**Figure S7:** Electrocardiographic findings following catecholaminergic stimulation in telemeter mice. **(A)** Breakdown of different arrhythmia events in mice following epinephrine injections, including atrioventricular block, **(B)** premature ventricular contractions, **(C)** ventricular tachycardia, **(D)** and bi/trigeminy. Stats performed using Mann–Whitney non-parametric test. \*  $p < 0.05$  (control  $n = 8$ ,  $Dsp^{R451G/+}$   $n = 7$ ).

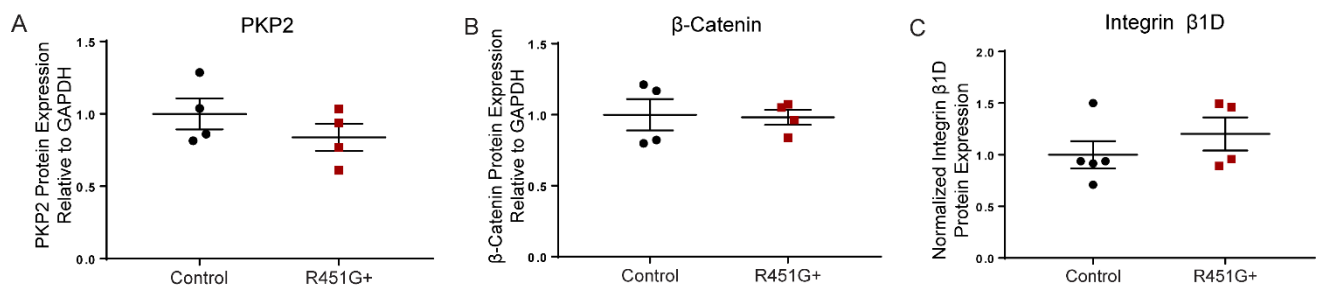

**Figure S8:** No changes in the expression of additional key ID proteins. Immunoblots of heart lysates from *Dsp<sup>R451G/+</sup>* and control littermates isolated at 3 months of age, evaluating expression of (A) plakophilin-2 (B) and β-catenin ( $n = 4$  per genotype). Quantification of each target relative to appropriate GAPDH staining. Note β-catenin shares the same GAPDH as the blots on figure 6 as it was probed for on the same blot. (C) Immunoblot probing for Integrin β1D (control  $n = 5$ , *Dsp<sup>R451G/+</sup>*  $n = 4$ ) quantified, relative to Ponceau staining. Stats performed using Student's t-test.

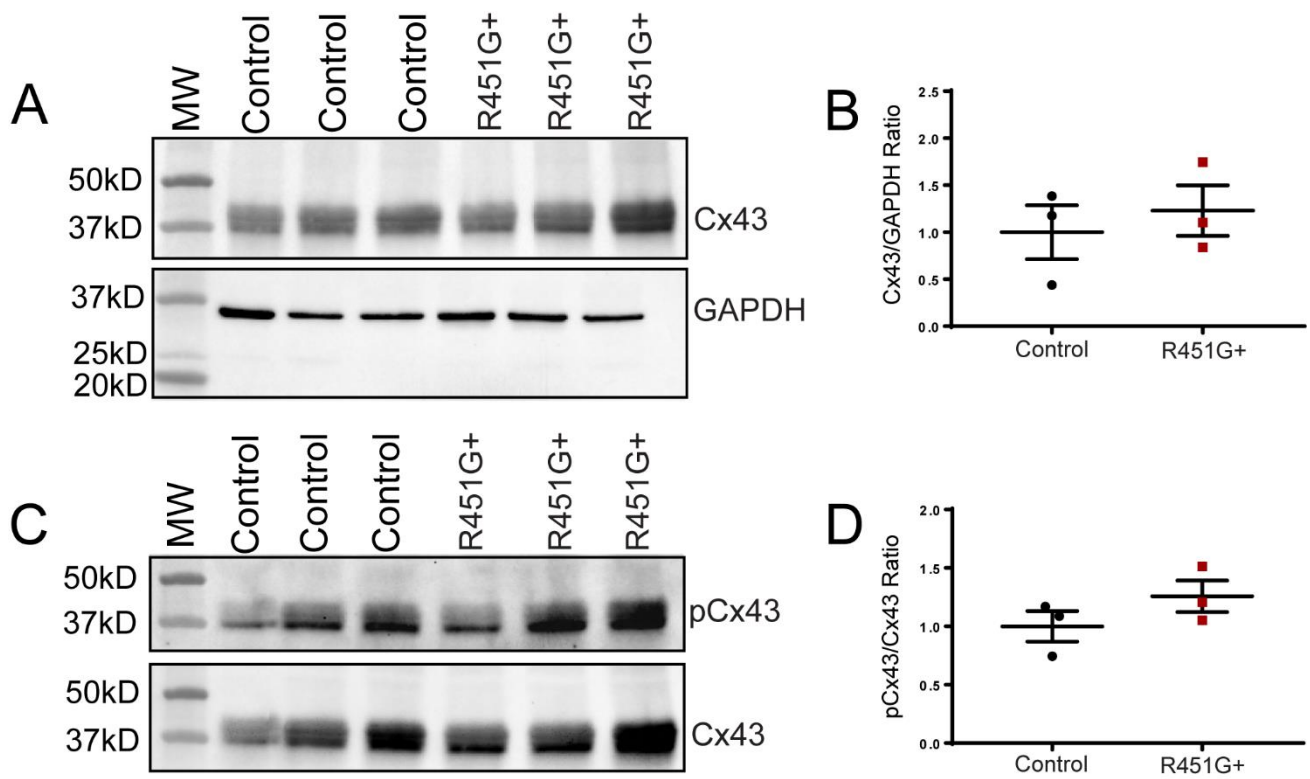

**Figure S9:** No changes in expression of Cx43 or pCx43 following TAC surgery. **(A)** Immunoblot probing for Cx43 and GAPDH **(B)** with quantification. **(C)** Immunoblot probing for S368-pCx43 and associated Cx43 staining **(D)** with quantification. Stats performed using Student's t-test ( $n = 3$  per genotype).
